# Supplementary material for: The Maxey-Riley-Gatignol equations for macroplastics in the North West European Shelf region
Source: Copernicus journal article supplement (doi:10.5194/egusphere-2026-64), 2026-01-15
Supplement: Supplementary file 1 [file egusphere-2026-64-supplement.pdf]

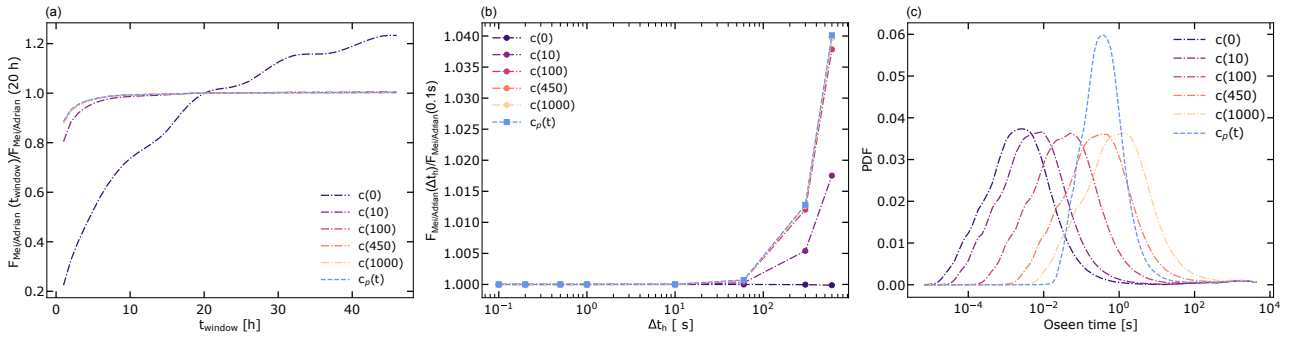

**Figure S1.** Checks for the history force calculations. For (a) and (b) a single particle starting at (14.50°W, 54.74°N) was used for the analysis. (a) Value of Mei/Adrian history force as function of the time window used in the trapezoidal method. A summation timestep of  $\Delta t_h = 1$  s was used. The values are normalized by the value found with  $t_{\text{window}} = 20$  h. The calculation was done for different  $c(\text{Re}_p)$  and  $c_p(t)$  as indicated by the legend. (b) Value of Mei/Adrian history force as function of the summation timestep  $\Delta t_h$  in the trapezoidal method. The values are normalized by the value calculated using  $\Delta t_h = 0.1$  s. The calculation was done for different  $c(\text{Re}_p)$  and  $c_p(t)$  as indicated by the legend. (c) Log-normal probability distribution of the Oseen time measured over the entire particle ensemble for different  $c(\text{Re}_p)$  and  $c_p(t)$  as indicated by the legend.
